# Supplementary material
Source: publisher figshare collection journal article supplement (https://sage.figshare.com/ndownloader/files/21208137)
Supplement: Supplementary file 1 [file 21208137]

### Supplemental Table 1

Factor Loadings for a 3-factor solution based on an Exploratory Factor Analysis Results with a Geomin rotation for the 19 negative symptom items on the Prodromal Questionnaire (PQ)

---

| Item | Question                                                                           | Factor 1 | Factor 2 | Factor 3 |
|------|------------------------------------------------------------------------------------|----------|----------|----------|
| 39   | I have gotten very nervous when I had to make polite conversation.                 | 1.108*   |          |          |
| 80   | I have been extremely anxious when meeting people for the first time.              | 1.109*   | .518*    |          |
| 87   | I have avoided going to places where there were many people because I get anxious. | .929*    |          |          |
| 33   | I have had nothing to say or very little to say.                                   | .868*    |          |          |
| 21   | I have been very quiet and have kept in the background on social occasions.        | .837*    |          |          |
| 43   | I have avoided social activities with other people.                                | .777*    |          |          |
| 59   | I have tended to keep my feelings to myself.                                       | .720*    |          |          |

|    |                                                                                                                                    |       |       |       |
|----|------------------------------------------------------------------------------------------------------------------------------------|-------|-------|-------|
| 66 | I have not been very good at returning social courtesies and gestures.                                                             | .711* |       |       |
| 78 | I have had little interest in getting to know other people.                                                                        | .707* |       |       |
| 58 | People have found me to be aloof and distant.                                                                                      | .561* |       |       |
| 42 | I have found it hard to be emotionally close to other people.                                                                      | .494* |       |       |
| 14 | I have had difficulty expressing my feelings as well as I used to.                                                                 | .303* |       |       |
| 48 | I have felt unable to enjoy things that I used to enjoy.                                                                           | .917* |       |       |
| 89 | I have felt uninterested in the things I used to enjoy.                                                                            | .897* |       |       |
| 85 | I have felt unable to carry out everyday tasks because of fatigue or lack of motivation.                                           | .307* | .402* |       |
| 16 | I have noticed a sense of not knowing who I am.                                                                                    | .346* | .311* |       |
| 71 | I have felt like I was looking at myself as in a movie, or that I was a spectator in my own life.                                  |       |       | .736* |
| 81 | I have felt like I was at a distance from myself, as if I were outside my own body or that a part of my body did not belong to me. |       |       | .782* |

|    |                                                                 |       |
|----|-----------------------------------------------------------------|-------|
|    | I have found that when something sad happened, I was no         |       |
| 82 | longer able to feel sadness, or when something joyful happened, | .554* |
|    | I could not feel happy.                                         |       |

---

Note:  $N=1,556$  Factor loadings  $<.3$  are suppressed. Probability  $*p<.05$

## Supplemental Table 2

Factor Loadings for a 4-factor solution based on an Exploratory Factor Analysis Results with a Geomin rotation for the 19 negative symptom items on the Prodromal Questionnaire (PQ)

---

| Item | Question                                                                    | Factor 1 | Factor 2 | Factor 3 | Factor 4 |
|------|-----------------------------------------------------------------------------|----------|----------|----------|----------|
| 33   | I have had nothing to say or very little to say.                            | .854*    |          |          |          |
| 21   | I have been very quiet and have kept in the background on social occasions. | .771*    |          |          |          |
| 59   | I have tended to keep my feelings to myself.                                | .686*    |          |          |          |

|    |                                                                                    |       |
|----|------------------------------------------------------------------------------------|-------|
| 58 | People have found me to be aloof and distant.                                      | .633* |
| 42 | I have found it hard to be emotionally close to other people.                      | .578* |
| 43 | I have avoided social activities with other people.                                | .514* |
| 78 | I have had little interest in getting to know other people.                        | .428* |
| 66 | I have not been very good at returning social courtesies and gestures.             | .405* |
| 14 | I have had difficulty expressing my feelings as well as I used to.                 | .326* |
| 80 | I have been extremely anxious when meeting people for the first time.              | .856* |
| 39 | I have gotten very nervous when I had to make polite conversation.                 | .767* |
| 87 | I have avoided going to places where there were many people because I get anxious. | .544* |

|    |                                                                                                                                                 |       |       |
|----|-------------------------------------------------------------------------------------------------------------------------------------------------|-------|-------|
| 89 | I have felt uninterested in the things I used to enjoy.                                                                                         |       | .949* |
| 48 | I have felt unable to enjoy things that I used to enjoy.                                                                                        |       | .797* |
| 82 | I have found that when something sad happened, I was no longer able to feel sadness, or when something joyful happened, I could not feel happy. | .345* | .438* |
| 85 | I have felt unable to carry out everyday tasks because of fatigue or lack of motivation.                                                        |       | .428* |
| 81 | I have felt like I was at a distance from myself, as if I were outside my own body or that a part of my body did not belong to me.              |       | .808* |
| 71 | I have felt like I was looking at myself as in a movie, or that I was a spectator in my own life.                                               |       | .800* |
| 16 | I have noticed a sense of not knowing who I am.                                                                                                 |       | .357* |

---

Note: N=1,556 Factor loadings <.3 are suppressed. Probability \* $p < .05$

### Supplemental Table 3

Fit Statistics based on an Exploratory Factor Analysis Results with a Geomin rotation for the 19 negative symptom items on the Prodromal Questionnaire (PQ)

| Factors  | Eigenvalue | chi-square | p-value | DF  | CFI   | RMSEA [CI]       | SRMR  | AIC      | BIC      |
|----------|------------|------------|---------|-----|-------|------------------|-------|----------|----------|
| 1 factor | 9.23       | 717.38     | >.000   | 152 | 0.933 | .069 [.064-.074] | 0.085 | 15024.81 | 15201.77 |
| 2 factor | 1.66       | 310.9      | >.000   | 134 | 0.979 | .041 [.035-.047] | 0.055 | 14744.74 | 15005.52 |
| 3 factor | 1.06       | 228.197    | >.000   | 117 | 0.987 | .035 [.028-.042] | 0.046 | 14697.97 | 15037.91 |
| 4 factor | 0.91       | 159.94     | >.000   | 101 | 0.993 | .027 [.019-.035] | 0.036 | 14668.78 | 15083.22 |
| 5 factor | 0.80       | 117.5      | >.000   | 86  | 0.996 | .022 [0.10-.031] | 0.03  | 14649.81 | 15134.86 |

Note: n=778. AIC and BIC were obtained utilizing the ML estimator; all other statistics are drawn from the WLSMV estimator in Mplus.

### Supplemental Table 4

Fit Statistics based on a Confirmatory Factor Analysis Results for the 19

negative symptom items on the Prodromal Questionnaire (PQ)

| Factors  | chi-square | p-value | DF  | CFI  | RMSEA [CI]      |
|----------|------------|---------|-----|------|-----------------|
| 1 factor | 714.80     | >.000   | 152 | 0.94 | .07 [.06-.07]   |
| 2 factor | 442.824    | >.000   | 151 | 0.97 | .05 [.044-.055] |
| 3 factor | 446.78     | >.000   | 149 | 0.97 | .05 [.045-.056] |
| 4 factor | 338.40     | >.000   | 146 | 0.98 | .04 [.035-.047] |

Note: n=778

**Supplemental Table 5**

Disattenuated correlations for a 2-factor model based on an EFA of the PQ-N

|        | PQ-N    | PQ-F1   | PQ-F2   | TEPS-A | TEPS-C | GCOS-A | GCOS-C | GCOS-I | CESD-10 | STAI-T | SPS   |
|--------|---------|---------|---------|--------|--------|--------|--------|--------|---------|--------|-------|
| PQ-N   | 0.88    | 1.09    | 1.04    | -0.24  | -0.12  | -0.13  | -0.01  | 0.39   | 0.79    | 0.69   | 0.64  |
| PQ F1  | 0.94**  | 0.84    | 0.79    | -0.25  | -0.14  | -0.12  | -0.03  | 0.40   | 0.68    | 0.58   | 0.64  |
| PQ F2  | 0.86**  | 0.64**  | 0.79    | -0.20  | -0.07  | -0.14  | 0.01   | 0.30   | 0.83    | 0.75   | 0.55  |
| TEPS-A | -0.20** | -0.20** | -0.15** | 0.75   | 0.65   | 0.37   | 0.25   | -0.05  | -0.29   | -0.14  | -0.13 |
| TEPS-C | -0.09** | -0.10** | -0.05*  | 0.46** | 0.67   | 0.40   | 0.04   | -0.03  | -0.16   | -0.09  | -0.08 |
| GCOS-A | -0.11** | -0.09** | -0.11** | 0.27** | 0.28** | 0.74   | 0.31   | -0.15  | -0.20   | -0.14  | -0.14 |

|         |        |        |        |         |         |         |        |        |        |        |      |
|---------|--------|--------|--------|---------|---------|---------|--------|--------|--------|--------|------|
| GCOS-C  | -0.01  | -0.02  | 0.01   | 0.17**  | 0.03    | 0.22**  | 0.65   | 0.36   | 0.01   | 0.06   | 0.04 |
| GCOS-I  | 0.30** | 0.30** | 0.22** | -0.04** | -0.02   | -0.11** | 0.24** | 0.67   | 0.35   | 0.33   | 0.43 |
| CESD-10 | 0.67** | 0.57** | 0.67** | -0.23** | -0.12** | -0.15** | 0.01   | 0.26** | 0.82   | 0.83   | 0.62 |
| STAI-T  | 0.60** | 0.49** | 0.62** | -0.12** | -0.07** | -0.11** | 0.05   | 0.25** | 0.70** | 0.86   | 0.61 |
| SPS     | 0.58** | 0.57** | 0.47** | -0.11*  | -0.06*  | -0.12** | 0.03   | 0.34** | 0.54** | 0.55** | 0.93 |

**Note:** N=1556; PQ: Prodromal Questionnaire; TEPS-ANT: Anticipatory pleasure; TEPS-CON: consummatory pleasure; GCOS-I,A,C: Impersonal, Autonomy, Control; CES-D-10: the Center for Epidemiologic Studies Depression Scale Short Form; STAI-T: State-Trait Anxiety Inventory Trait-Form; SPS: Social Phobia Scale; Probability: \*p<.05; \*\* p<.01. Raw correlations are on the lower segment, reliabilities (alpha) are on the diagonal, and disattenuated correlations are on the upper segment.

### Supplemental Table 6

Disattenuated correlations for a 3-factor model based on an EFA of the PQ-N

|        | PQ-N    | PQ-F1   | PQ-F2   | PQ-F3   | TEPS-A | TEPS-C | GCOS-A  | GCOS-C | GCOS-I | CESD-10 | STAI-T | SPS   |
|--------|---------|---------|---------|---------|--------|--------|---------|--------|--------|---------|--------|-------|
| PQ-N   | 0.88    | 1.11    | 1.00    | 0.91    | -0.24  | -0.12  | -0.13   | -0.01  | 0.39   | 0.79    | 0.69   | 0.64  |
| PQ-F1  | 0.95**  | 0.84    | 0.79    | 0.69    | -0.24  | -0.14  | -0.13   | -0.02  | 0.40   | 0.70    | 0.61   | 0.65  |
| PQ-F2  | 0.80**  | 0.62**  | 0.73    | 0.81    | -0.19  | -0.07  | -0.11   | 0.00   | 0.31   | 0.83    | 0.72   | 0.51  |
| PQ-F3  | 0.64**  | 0.47**  | 0.52**  | 0.56    | -0.19  | -0.04  | -0.13   | 0.01   | 0.25   | 0.72    | 0.66   | 0.53  |
| TEPS-A | -0.20** | -0.19** | -0.14** | -0.12** | 0.75   | 0.65   | 0.37    | 0.25   | -0.05  | -0.29   | -0.14  | -0.13 |
| TEPS-C | -0.09** | -0.11** | -0.05   | -0.03   | 0.46** | 0.67   | 0.40    | 0.04   | -0.03  | -0.16   | -0.09  | -0.08 |
| GCOS-A | -0.11** | -0.10** | -0.08** | -0.08** | 0.27** | 0.28** | 0.74    | 0.31   | -0.15  | -0.20   | -0.14  | -0.14 |
| GCOS-C | -0.01   | -0.02   | 0.00    | 0.01    | 0.17** | 0.03   | 0.22**  | 0.65   | 0.36   | 0.01    | 0.06   | 0.04  |
| GCOS-I | 0.30**  | 0.30**  | 0.22**  | 0.15**  | -0.04  | -0.02  | -0.11** | 0.24** | 0.67   | 0.35    | 0.33   | 0.43  |



|         |        |        |        |        |         |         |         |      |        |        |        |      |
|---------|--------|--------|--------|--------|---------|---------|---------|------|--------|--------|--------|------|
| CESD-10 | 0.67** | 0.58** | 0.64** | 0.49** | -0.23** | -0.12** | -0.15** | 0.01 | 0.26** | 0.82   | 0.83   | 0.62 |
| STAI-T  | 0.60** | 0.52** | 0.57** | 0.46** | -0.12** | -0.07** | -0.11** | 0.05 | 0.25** | 0.70** | 0.86   | 0.61 |
| SPS     | 0.58** | 0.57** | 0.42** | 0.38** | -0.11** | -0.06*  | -0.12** | 0.03 | 0.34** | 0.54** | 0.55** | 0.93 |

N=1556; PQ: Prodromal Questionnaire; TEPS-ANT: Anticipatory pleasure; TEPS-CON: consummatory pleasure; GCOS-I,A,C: Impersonal, Autonomy,

Control; CES-D-10: the Center for Epidemiologic Studies Depression Scale Short Form; STAI-T: State-Trait Anxiety Inventory Trait-Form; SPS: Social Phobia

Scale; Probability: \* $p < .05$ ; \*\*  $p < .01$ . Raw correlations are on the lower segment, reliabilities (alpha) are on the diagonal, and disattenuated correlations are on the upper segment.

### Supplemental Table 7

Disattenuated correlations for a 4-factor model based on an EFA of the PQ-N

|        | PQ-N    | PQ-F1   | PQ-F2   | PQ-F3   | PQ-F4    | TEPS-A | TEPS-C | GCOS-A | GCOS-C | GCOS-I | CESD-10 | STAI-T | SPS   |
|--------|---------|---------|---------|---------|----------|--------|--------|--------|--------|--------|---------|--------|-------|
| PQ-N   | 0.88    | 1.10    | 0.93    | 0.97    | 0.92     | -0.24  | -0.12  | -0.13  | -0.01  | 0.39   | 0.79    | 0.69   | 0.64  |
| PQ-F1  | 0.93**  | 0.81    | 0.80    | 0.79    | 0.70     | -0.27  | -0.16  | -0.13  | -0.03  | 0.37   | 0.71    | 0.58   | 0.56  |
| PQ-F2  | 0.74**  | 0.61**  | 0.71    | 0.58    | 0.54     | -0.13  | -0.06  | -0.09  | -0.01  | 0.39   | 0.57    | 0.56   | 0.75  |
| PQ-F3  | 0.79**  | 0.62**  | 0.43**  | 0.76    | 0.75     | -0.21  | -0.10  | -0.11  | 0.00   | 0.30   | 0.81    | 0.69   | 0.50  |
| PQ-F4  | 0.63**  | 0.47**  | 0.34**  | 0.48**  | 0.54     | -0.13  | 0.02   | -0.14  | 0.01   | 0.25   | 0.72    | 0.69   | 0.52  |
| TEPS-A | -0.20** | -0.21** | -0.10** | -0.16** | -0.08*** | 0.75   | 0.65   | 0.37   | 0.25   | -0.05  | -0.29   | -0.14  | -0.13 |
| TEPS-C | -0.09** | -0.12** | -0.04   | -0.07** | 0.01     | 0.46** | 0.67   | 0.40   | 0.04   | -0.03  | -0.16   | -0.09  | -0.08 |
| GCOS-A | -0.11** | -0.10** | -0.06*  | -0.08** | -0.09**  | 0.27** | 0.28** | 0.74   | 0.31   | -0.15  | -0.20   | -0.14  | -0.14 |

|         |        |        |        |        |        |         |         |         |        |        |        |       |      |
|---------|--------|--------|--------|--------|--------|---------|---------|---------|--------|--------|--------|-------|------|
| GCOS-C  | -0.01  | -0.02  | -0.01  | 0.00   | 0.01   | 0.17**  | 0.03    | 0.22**  | 0.65   | 0.36   | 0.01   | 0.06  | 0.04 |
| GCOS-I  | 0.30** | 0.27** | 0.27** | 0.22** | 0.15** | -0.04   | -0.02   | -0.11** | 0.24** | 0.67   | 0.35   | 0.33  | 0.43 |
| CESD-10 | 0.67** | 0.58** | 0.44** | 0.64** | 0.48** | -0.23** | -0.12** | -0.15** | 0.01   | 0.26** | 0.82   | 0.83  | 0.62 |
| STAI-T  | 0.60** | 0.49** | 0.44** | 0.56** | 0.47** | -0.12** | -0.07** | -0.11** | 0.05   | 0.25** | 0.70** | 0.86  | 0.61 |
| SPS     | 0.58** | 0.49** | 0.61** | 0.42** | 0.37** | -0.11** | -0.06*  | -0.12** | 0.03   | 0.34** | 0.54** | 0.55* | 0.93 |

**Note:** N=1556; PQ: Prodromal Questionnaire; TEPS-ANT: Anticipatory pleasure; TEPS-CON: consummatory pleasure; GCOS-I,A,C: Impersonal, Autonomy, Control;

CES-D-10: the Center for Epidemiologic Studies Depression Scale Short Form; STAI-T: State-Trait Anxiety Inventory Trait-Form; SPS: Social Phobia Scale;

Probability: \* $p < .05$ ; \*\*  $p < .01$ . Raw correlations are on the lower segment, reliabilities (alpha) are on the diagonal, and disattenuated correlations are on the upper segment.
